# Supplementary material for: Graphene and graphene–cellulose nanocrystal composite films for sustainable anodes in biophotovoltaic devices
Source: Royal Society of Chemistry journal article supplement (doi:10.1039/d3se01185b), 2023-12-01
Supplement: d3se01185b1.pdf [file d3se01185b1.pdf]

## Graphene and graphene-cellulose nanocrystals composite films for sustainable anodes in biophotovoltaic devices

Sara Lund<sup>\*,a,b,c</sup>, Laura T. Wey<sup>\*,c</sup>, Jouko Peltonen<sup>a</sup>, Johan Bobacka<sup>a,b</sup>, Rose-Marie-Latonen<sup>†,a,b</sup>, Yagut Allahverdiyeva<sup>†,c</sup>

<sup>a</sup> Laboratory of Molecular Science and Engineering, Faculty of Science and Engineering, Åbo Akademi University, Henriksgatan 2, 20500 Turku (Åbo), Finland

<sup>b</sup> Johan Gadolin Process Chemistry Centre (PCC), Åbo Akademi University, Henriksgatan 2, 20500 Turku (Åbo), Finland

<sup>c</sup> Photomicrobes Research Group, Molecular Plant Biology unit, Department of Life Technologies, University of Turku, 20014 Turku, Finland.

\*These authors contributed equally: Sara Lund, Laura T. Wey

†Corresponding authors: allahve@utu.fi, rose-marie.latonen@abo.fi

## Supplementary Information

**Table S1** A comparison of graphene-based electrodes in three-electrode biophotovoltaic systems. PSII = photosystem II, 2,6-dichloro-1,4-benzoquinone = DCBQ, IO = inverse opal, RGO = reduced graphene oxide, ITO = indium tin oxide, PEI = polyethyleneimine, TM = thylakoid membrane, GC = glassy carbon, PAH = polyallylamine hydrochloride, PEN = polyethylene naphthalate, CNC = cellulose nanocrystals, \* = co-assembled with the biocatalyst. The current at 0.6 V vs SHE using the graphene anode was recorded during the stepped chronoamperometry measurement (Fig. S5) which was not done with the graphene-CNC electrode.

| Biocatalyst          | Artificial electron mediator                | Electrode material        | Electrode structure              | Reducing agents                | Applied Bias Potential (V vs SHE) | Photocurrent ( $\mu\text{A cm}^{-2}$ )                                            | Year | Ref.         |
|----------------------|---------------------------------------------|---------------------------|----------------------------------|--------------------------------|-----------------------------------|-----------------------------------------------------------------------------------|------|--------------|
| PSII                 | DCBQ                                        | IO-RGO on ITO             | 3D                               | Reduced by annealing at 500 °C | 0.5                               | 0.44 $\pm$ 0.02 (no artificial mediator)<br>4.19 $\pm$ 0.01 (artificial mediator) | 2019 | <sup>1</sup> |
| PSII                 | No                                          | PEI-RGO* on ITO           | Layered                          | Hydrazine                      | 0.49                              | 0.0372                                                                            | 2015 | <sup>2</sup> |
| TM                   | No                                          | Aminoaryl func. RGO on GC | Porous/3D, planar microstructure | Electroreduction               | 0.6                               | 5.24 $\pm$ 0.50                                                                   | 2018 | <sup>3</sup> |
| TM                   | 1.5 mM $\text{K}_4[\text{Fe}(\text{CN})_6]$ | GO / RGO* on ITO          | Flat                             | PAH, hydrazine                 | 0.44                              | 21.37 $\pm$ 1.11 / 18.95 $\pm$ 0.54                                               | 2018 | <sup>4</sup> |
| TM                   | 10 mM $\text{K}_3[\text{Fe}(\text{CN})_6]$  | GO* on ITO-PEN            | Flat                             | Not reduced                    | 0.64                              | 3.92                                                                              | 2019 | <sup>5</sup> |
| <i>Synechocystis</i> | 1.0 mM $\text{K}_3[\text{Fe}(\text{CN})_6]$ | Graphene                  | Rough                            | No                             | 0.70 (Fig. 4B)                    | 2.17 $\pm$ 0.74                                                                   | 2023 | This work    |
| <i>Synechocystis</i> | 1.0 mM $\text{K}_3[\text{Fe}(\text{CN})_6]$ | Graphene-CNC (thick)      | Rough                            | No                             | 0.70 (Fig. 4B)                    | 1.11 $\pm$ 0.60                                                                   | 2023 | This work    |
| <i>Synechocystis</i> | 1.0 mM $\text{K}_3[\text{Fe}(\text{CN})_6]$ | Graphene-CNC (thin)       | Rough                            | No                             | 0.70 (Fig. 4B)                    | 0.60 $\pm$ 0.12                                                                   | 2023 | This work    |
| <i>Synechocystis</i> | No                                          | Graphene                  | Rough                            | No                             | 0.60 (Fig. S5)                    | 0.058 $\pm$ 0.018                                                                 | 2023 | This work    |

**Table S2** A comparison of graphene-based electrodes in two-electrode biophotovoltaic systems. RGO = reduced graphene oxide, TiO<sub>2</sub> = titanium dioxide, CC = carbon cloth.

| Biocatalyst                      | Artificial electron mediator | Anode material              | Anode structure | Max. power output (mW m <sup>-2</sup> )                  | Year | Ref.         |
|----------------------------------|------------------------------|-----------------------------|-----------------|----------------------------------------------------------|------|--------------|
| <i>Chlorella</i> sp. (UMACC 313) | NA                           | RGO on glass                | Porous          | 0.27 (dark background not subtracted)                    | 2014 | <sup>6</sup> |
| <i>Chlorella</i> sp. (UMACC 313) | NA                           | RGO on glass                | Rough           | 6.935 x 10 <sup>8</sup> (dark background not subtracted) | 2017 | <sup>7</sup> |
| <i>Synechococcus elongatus</i>   | NA                           | RGO on glass                | NA              | 0.538 ± 0.014                                            | 2018 | <sup>8</sup> |
| <i>Chlorella vulgaris</i>        | No                           | TiO <sub>2</sub> /RGO on CC | Fibrous         | 34.66 ± 1.3                                              | 2018 | <sup>9</sup> |

**Table S3** Surface roughness parameters of graphene and graphene-CNC films determined from 5.0 μm × 5.0 μm AFM images. Data presented as mean ± standard deviation (n = 3 films, 3 images /per film). The parameters are Root-mean-square (RMS)-roughness (S<sub>q</sub>), ten-point height (S<sub>10z</sub>), skewness (S<sub>sk</sub>), kurtosis (S<sub>ku</sub>), density of summits (S<sub>ds</sub>) and effective surface area (S<sub>dr</sub>).

| Film material | S <sub>q</sub> (nm) | S <sub>10z</sub> (nm) | S <sub>sk</sub> | S <sub>ku</sub> | S <sub>ds</sub> (μm <sup>-2</sup> ) | S <sub>dr</sub> (%) |
|---------------|---------------------|-----------------------|-----------------|-----------------|-------------------------------------|---------------------|
| Graphene      | 44.1 ± 13.4         | 238 ± 76              | 0.2 ± 0.3       | 3.3 ± 0.4       | 29.0 ± 6.7                          | 1.6 ± 1.3           |
| Graphene-CNC  | 40.8 ± 3.2          | 334 ± 21              | -0.1 ± 0.2      | 3.5 ± 0.1       | 163.5 ± 21.3                        | 16.6 ± 0.7          |

**Table S4** The anodic and cathodic peak currents ( $I_{p,a}$  and  $I_{p,c}$ ) and potentials ( $E_{p,a}$  and  $E_{p,c}$ ), and the peak separation ( $\Delta E_p$ ) for different replicates of graphene and graphene-CNC electrodes spray-coated on non-conductive glass measured in 1.0 M  $\text{KNO}_3$  electrolyte with either 0.5 mM  $\text{K}_3[\text{Fe}(\text{CN})_6]$  and 0.5 mM  $\text{K}_4[\text{Fe}(\text{CN})_6]$  or 1.0 mM  $[\text{Ru}(\text{NH}_3)_6]\text{Cl}_3$  with a scan rate of  $50 \text{ mV s}^{-1}$ . Dispersion volumes of 2.5 ml and 2.0 ml were used for spray-coating the thick and thin electrodes, respectively.

| Electrode                                                  | $I_{p,a}$<br>( $\text{mA cm}^{-2}$ ) | $E_{p,a}$<br>(V) | $I_{p,c}$<br>( $\text{mA cm}^{-2}$ ) | $E_{p,c}$<br>(V) | $\Delta E_p$<br>(V) | Fig. No |
|------------------------------------------------------------|--------------------------------------|------------------|--------------------------------------|------------------|---------------------|---------|
| Graphene with $\text{Fe}(\text{CN})_6^{3-/4-}$             | 0.13                                 | 0.33             | -0.15                                | 0.24             | 0.090               | 2B      |
| Graphene-CNC with $\text{Fe}(\text{CN})_6^{3-/4-}$         | 0.13                                 | 0.40             | -0.12                                | 0.19             | 0.21                | 2B      |
| ITO with $\text{Fe}(\text{CN})_6^{3-/4-}$                  | 0.12                                 | 0.32             | -0.12                                | 0.23             | 0.091               | 2B      |
|                                                            |                                      |                  |                                      |                  |                     |         |
| Graphene with $\text{Ru}(\text{NH}_3)_6^{3+}$              | 0.14                                 | -0.14            | -0.24                                | -0.24            | 0.10                | S2      |
| Graphene-CNC with $\text{Ru}(\text{NH}_3)_6^{3+}$          | 0.11                                 | -0.051           | -0.086                               | -0.30            | 0.25                | S2      |
|                                                            |                                      |                  |                                      |                  |                     |         |
| Graphene-CNC (thin) with $\text{Fe}(\text{CN})_6^{3-/4-}$  | 0.11                                 | 0.38             | -0.11                                | 0.185            | 0.20                | S6      |
| Graphene-CNC (thick) with $\text{Fe}(\text{CN})_6^{3-/4-}$ | 0.11                                 | 0.37             | -0.093                               | 0.200            | 0.18                | S6      |
|                                                            |                                      |                  |                                      |                  |                     |         |
| Graphene (thin) with $\text{Fe}(\text{CN})_6^{3-/4-}$      | 0.17                                 | 0.32             | -0.17                                | 0.23             | 0.090               | S6      |
| Graphene (thick) with $\text{Fe}(\text{CN})_6^{3-/4-}$     | 0.13                                 | 0.33             | -0.15                                | 0.23             | 0.095               | S6      |

**Table S5** The average thicknesses, conductivities and sheet resistance ranges of graphene and graphene-CNC films. Thicknesses and conductivities presented as mean  $\pm$  standard deviation (graphene and thick graphene-CNC:  $n = 4$ , thin graphene-CNC:  $n = 3$ ). The sheet resistances are calculated for the same films and given as a range from the smallest to the largest value.

| Film type            | Film thickness (nm) | Film conductivity ( $\text{S m}^{-1}$ ) | Sheet resistance ( $\Omega/\text{sq}$ ) |
|----------------------|---------------------|-----------------------------------------|-----------------------------------------|
| Graphene             | $760 \pm 100$       | $8\,900 \pm 1\,300$                     | 130 - 170                               |
| Graphene-CNC (thick) | $1590 \pm 460$      | $1\,500 \pm 400$                        | 270 - 790                               |
| Graphene-CNC (thin)  | $880 \pm 140$       | Not measured                            |                                         |

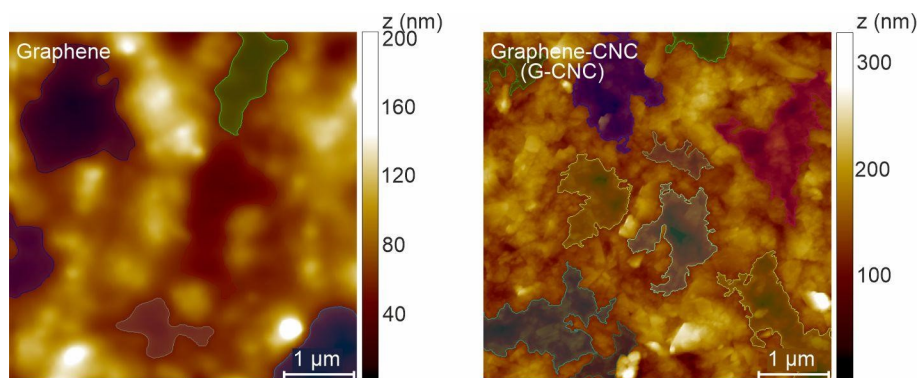

**Fig. S1** Top-view topographical atomic force micrograms of graphene (on the left) and graphene-CNC (on the right) films on glass. Scale bar 1  $\mu\text{m}$  indicates x-y plane; whole image is 5.0  $\mu\text{m}$  x 5.0  $\mu\text{m}$ ; colour scale bar on right indicates z-height. The coloured areas in the images boundary cavities.

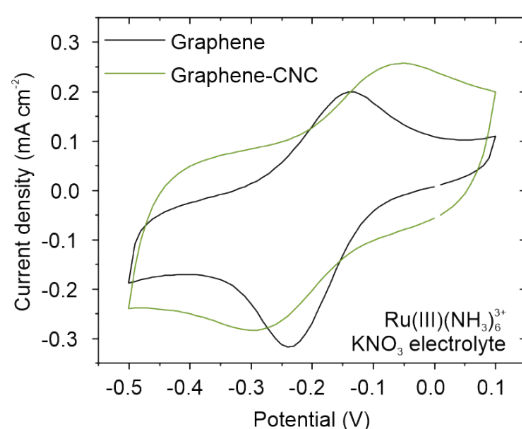

**F**

**fig. S2** Cyclic voltammograms of the graphene (black) and graphene-CNC (green) films on non-conductive glass in 1.0 mM  $[\text{Ru}(\text{NH}_3)_6]\text{Cl}_3$  and 1.0 M  $\text{KNO}_3$  as the background electrolyte. Scan rate 50  $\text{mV s}^{-1}$ . The last cycle of five cycles is shown. The scanning direction which applies for all CVs is indicated with an arrow in Fig. 2A. The starting potential was 0.0 V.

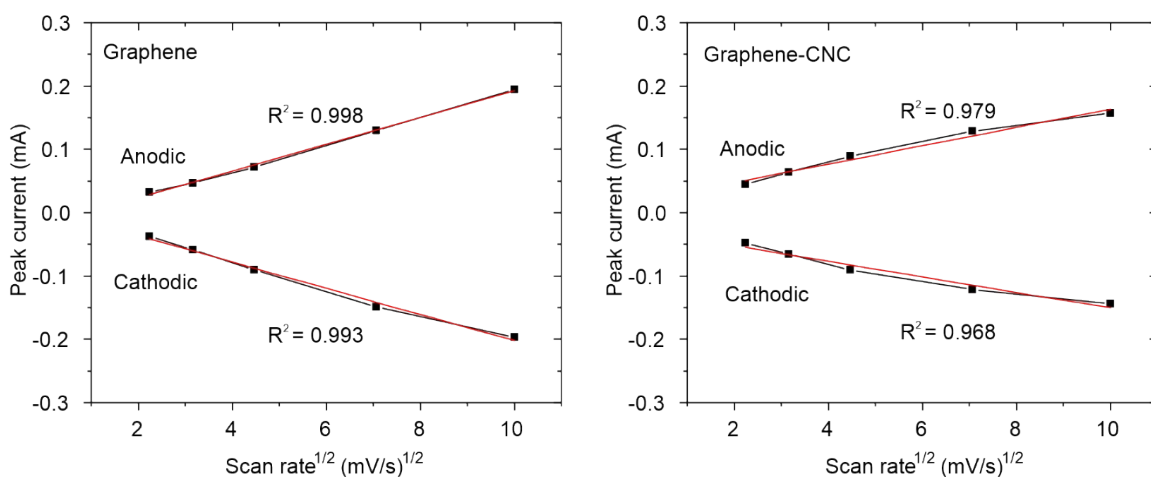

**F**

**fig. S3** The anodic and the cathodic peak currents as a function of the square roots of the scan rates of graphene (on the left) and graphene-CNC (on the right) films in 0.5 mM  $\text{K}_3[\text{Fe}(\text{CN})_6]$ , 0.5 mM  $\text{K}_4[\text{Fe}(\text{CN})_6]$  and 1.0 M  $\text{KNO}_3$  measured with scan rates of 5, 10, 20, 50 and 100  $\text{mV s}^{-1}$ .

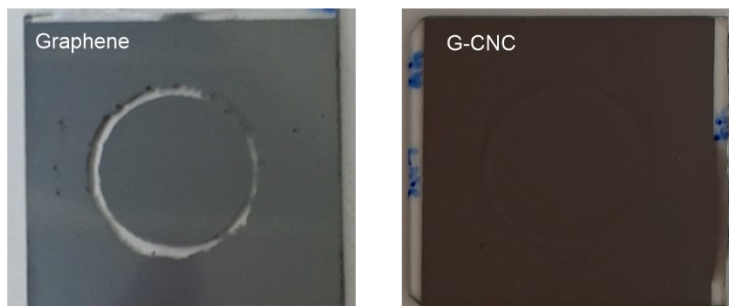

**Fig. S4** Photos of graphene and graphene-CNC films on glass substrate after cyclic voltammetry experiments were performed in BG11 (pH 8.2) electrolyte and photoelectrochemical apparatus was disassembled.

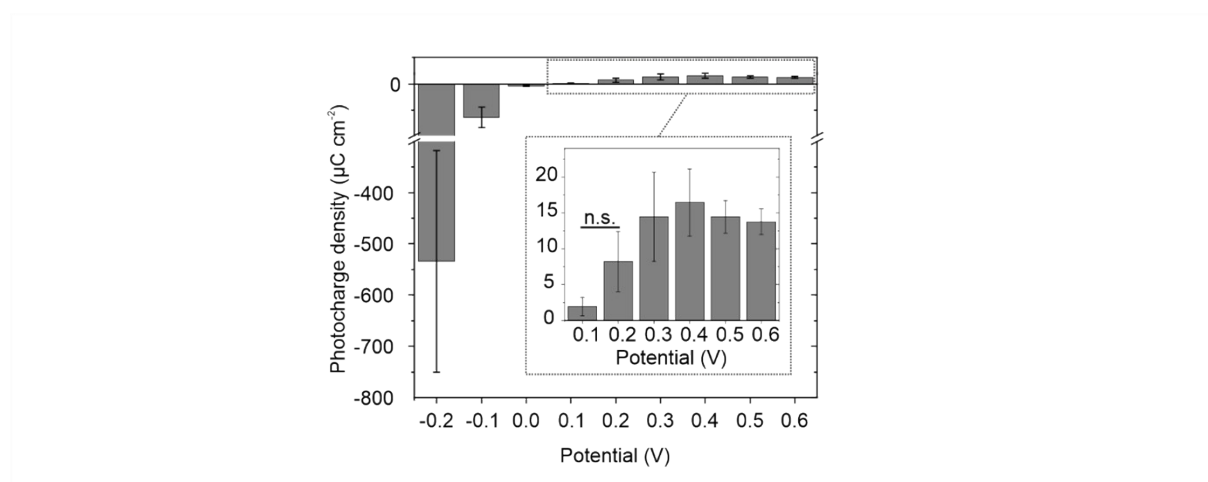

**Fig. S5** Photocharge density of cyanobacterial cells on graphene anodes at different applied potentials (V vs Ag/AgCl) in BG11 (pH 8.2) electrolyte with 60 nmol Chl a loading and 17 h biofilm formation. The data was recorded under 5/5 min light/dark cycles with light intensity  $100 \mu\text{mol}_{\text{photons}} \text{m}^{-2} \text{s}^{-1}$  and wavelength 660 nm. Photocharge was calculated as area under the current-time trace in light minus the area in dark, each for 5 min. All photocharges in this study are calculated this way. Data presented as the mean of four biological replicates and the error bars are the standard error of the mean.

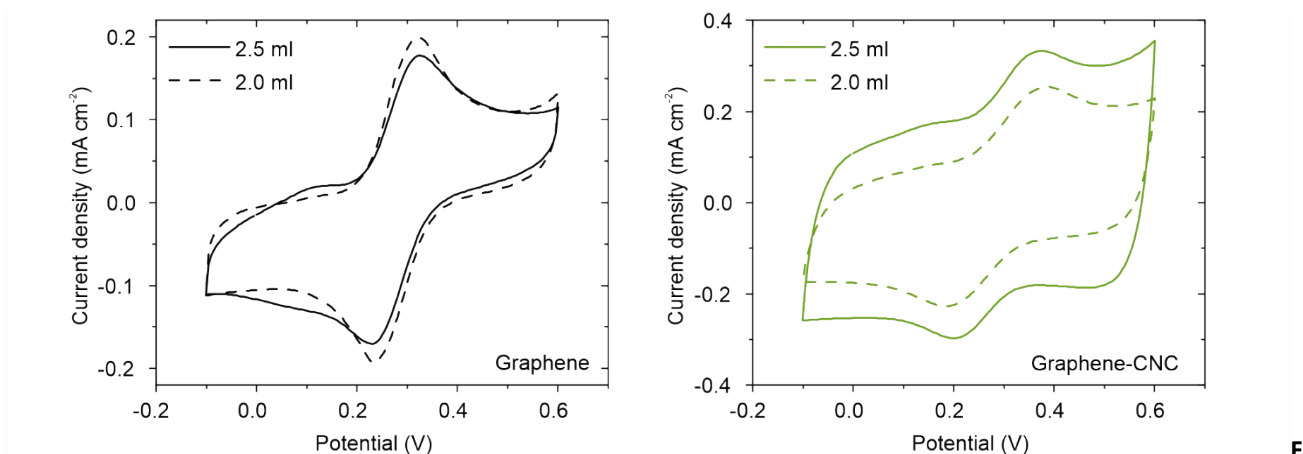

**fig. S6** Cyclic voltammograms of the graphene (on the left) and graphene-CNC (on the right) films with different thicknesses on non-conductive glass in 0.5 mM  $K_3[Fe(CN)_6]$  and 0.5 mM  $K_4[Fe(CN)_6]$  with 1.0 M  $KNO_3$  as the background electrolyte using a scan rate of  $50 \text{ mV s}^{-1}$ . The films of different thicknesses were prepared from the same dispersions using either 2.5 (solid line) or 2.0 ml (dashed line) dispersion volume in spray-coating. The scanning direction which applies for all CVs is indicated with an arrow in Fig. 2A. The starting potential was 0.0 V.

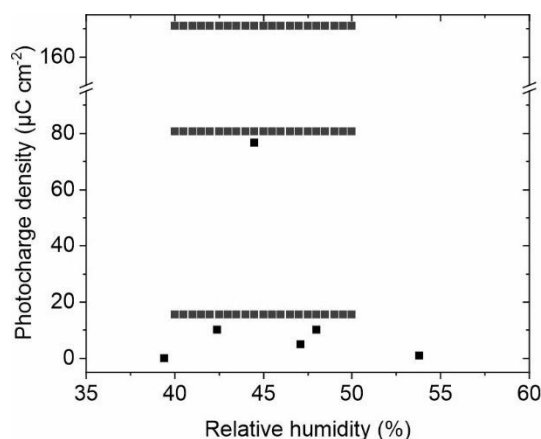

**Fig. S7** Photocharge density of cyanobacterial cells on graphene anodes as a function of relative humidity (RH) with  $60 \text{ nmol}_{Chl a}$  loading and 17 h biofilm formation. The data was recorded under 5/5 min light/dark cycles with light intensity  $100 \mu\text{mol}_{\text{photons}} \text{ m}^{-2} \text{ s}^{-1}$  and wavelength 660 nm. The dark grey rectangular lines represent the data points where the humidity is estimated to be 40-50% RH. The black squares represent the measured average humidity during the 17 h biofilm incubation.

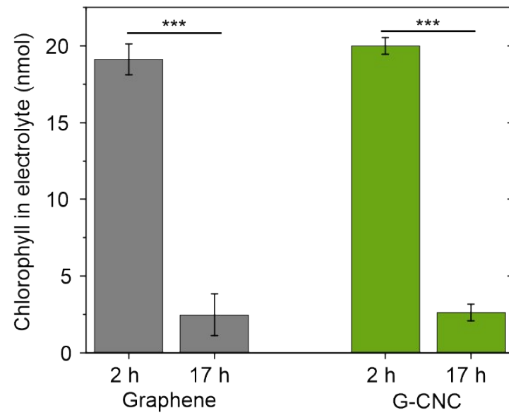

F

**ig. S8** Chlorophyll quantification of cyanobacterial cells suspended in the electrolyte after photoelectrochemical experiments after 2 and 17 h biofilm incubation times. Data presented as mean  $\pm$  standard error of the mean ( $n = 4$  for graphene 2 h,  $n = 3$  for graphene 17 h,  $n = 2$  for G-CNC 2 h and  $n = 6$  for G-CNC 17 h), statistical significance by t-test  $P \leq 0.001$  denoted by \*\*\*.

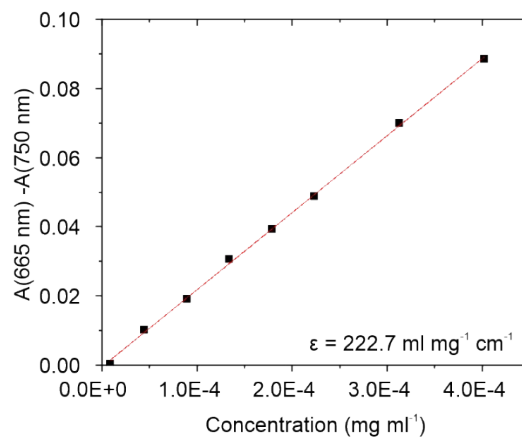

F

**ig. S9** Absorbance determined with UV-Vis spectroscopy as a function of Chl *a* concentration in 90 % (v/v) MeOH solution containing also 10% (v/v) electrolyte of BG11 with ferricyanide and DCBQ artificial electron mediator. The extinction coefficient is the slope of the calibration curve.



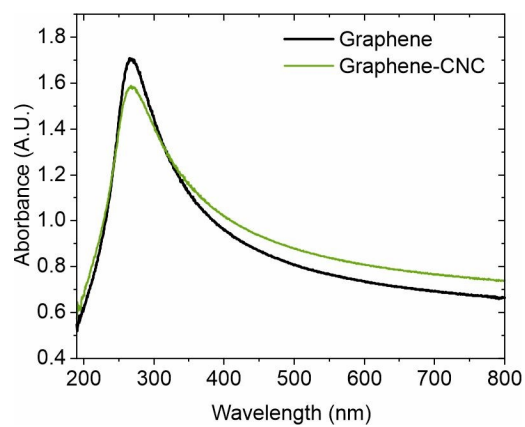

**Fig. S10** Representative UV-vis absorption spectra of graphene and graphene-CNC dispersions showing the typical peak at ca 270 nm corresponding to the  $\pi$ - $\pi^*$  transition of aromatic C-C bonds in graphene.

## References

1. X. Fang, K. P. Sokol, N. Heidary, T. A. Kandiel, J. Z. Zhang and E. Reisner, *Nano Lett.*, 2019, **19**, 1844–1850.
2. P. Cai, X. Feng, J. Fei, G. Li, J. Li, J. Huang and J. Li, *Nanoscale*, 2015, **7**, 10908–10911.
3. G. Pankratova, D. Pankratov, C. Di Bari, A. Goñi-Urtiaga, M. D. Toscano, Q. Chi, M. Pita, L. Gorton and A. L. De Lacey, *ACS Appl. Energy Mater.*, 2018, **1**, 319–323.
4. P. Cai, G. Li, Y. Yang, X. Su and Z. Zhang, *Colloids and Surfaces A: Physicochemical and Engineering Aspects*, 2018, **555**, 37–42.
5. H. Shin, T. Kim, I. Seo, S. Kim, Y. J. Kim, H. Hong, Y. Park, H. M. Jeong, K. Kim and W. Ryu, *Applied Surface Science*, 2019, **481**, 1–9.
6. F.-L. Ng, M. M. Jaafar, S.-M. Phang, Z. Chan, N. A. Salleh, S. Z. Azmi, K. Yunus, A. C. Fisher and V. Periasamy, *Scientific Reports*, 2014, **4**, 7562.
7. S. A. Ibrahim, M. M. Jaafar, F.-L. Ng, S.-M. Phang, G. G. Kumar, W. H. A. Majid and V. Periasamy, *Appl. Phys. A*, 2018, **124**, 59.
8. F.-L. Ng, S.-M. Phang, V. Periasamy, J. Beardall, K. Yunus and A. C. Fisher, *J Appl Phycol*, 2018, **30**, 2981–2988.
9. N. Senthilkumar, S. Sheet, Y. Sathishkumar, Y. S. Lee, S.-M. Phang, V. Periasamy and G. Gnana kumar, *Appl. Phys. A*, 2018, **124**, 769.
